# Supplementary material for: Pilot Study on Fire Effluent Condensate from Full Scale Residential Fires
Source: Springer Nature journal article supplement (doi:10.1007/s10694-023-01487-4), 2023-09-20
Supplement: MOESM1 [file 26067540]

# Pilot Study on Fire Effluent Condensate from Full Scale Residential Fires: Supplementary information

**Supplementary information.** Additional details regarding methods and results from each live-fire experiment are provided in the following sections. Detailed descriptions of the experimental structures, instrumentation, fuel load, and ventilation are provided along with laboratory detection and reporting limits for water sampling. Representative temperature and gas concentration time-histories are also provided for each experiment to describe the local conditions within the structure from which condensate samples were collected. Finally, the concentrations of all compounds detected in the condensate, baseline rinse and runoff water are provided along with laboratory dilution factors, detection limits and reporting limits.

## S.1 Experiment Structures

Experiments 1–4 were conducted in purpose-built, ranch-style, single-story residential structures constructed at the Delaware County Emergency Services Training Center in Sharon Hill, PA. The structures were built for a project studying search and rescue tactics for firefighters as reported by Weinschenk and Regan [1, 2]. Those reports include thorough details about the construction of the buildings. A dimensioned floor plan of the structure is shown in Figure S1. Experiment 1 was conducted in Bedroom 3 and Experiment 2 was in Bedroom 4. Experiments 3 and 4 were both conducted in the living room. Each of these experiments were conducted with all interior bedroom doors in the closed position. The dimensions of the windows and doors are summarized in Table S1.

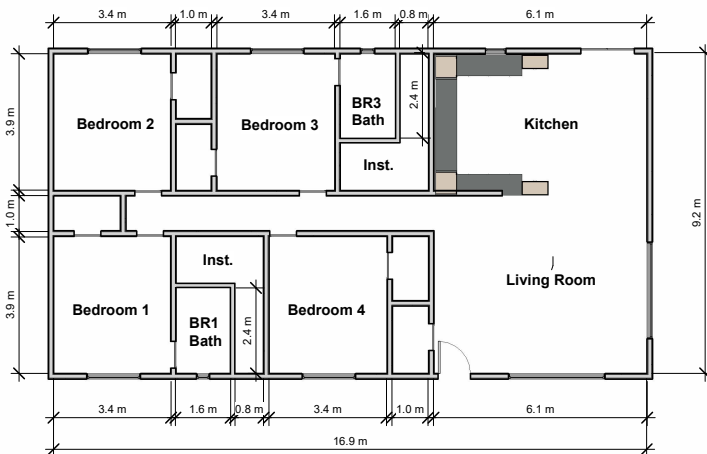

**Fig. S1:** Dimensioned floor plan for Experiments 1–4.

**Table S1:** Dimensions of windows and doors for Experiments 1–4.

| Vent                | Size [width x height] (cm) | Sill Height (cm) |
|---------------------|----------------------------|------------------|
| Living Room Windows | 183 x 152                  | 61               |
| Bedroom Windows     | 183 x 122                  | 91               |
| Kitchen Window      | 91 x 91                    | 122              |
| Front Door          | 91 x 203                   | —                |
| Interior Doors      | 76 x 203                   | —                |

Experiment 5 was conducted in a purpose-built, two-story structure at the Delaware County Emergency Services Training Center. The structure was built for studying basement fires, as reported by Madrzykowski and Weinschenk, who describe its construction [3]. The exterior walls of the lower floor are built from 61 cm thick, interlocking concrete blocks to simulate a basement. Experiment 5 was conducted using only the basement floor after it was modified to simulate a furnished studio apartment (including a bedroom, kitchenette, office and living room) by isolating one-half of the floor away from the stairwell and the rest of the structure (Figure S2). The grey areas in the floor plan are not part of the experimental volume. The dimensions of the vents are summarized in Table S2.

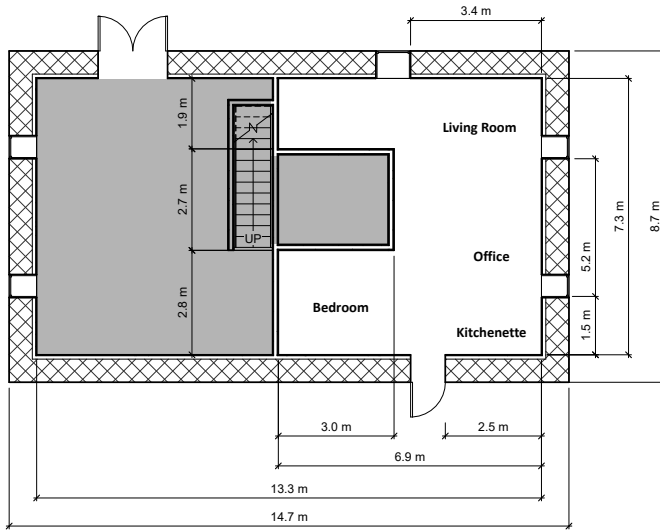

**Fig. S2:** Dimensioned floor plan for Experiment 5.

**Table S2:** Dimensions of windows and door for Experiment 5.

| Vent              | Size [width x height] (cm) | Sill Height (cm) |
|-------------------|----------------------------|------------------|
| Side Wall Windows | 61 x 25                    | 198              |
| Rear Wall Window  | 100 x 85                   | 149              |
| Front Door        | 91 x 203                   | —                |

## S.2 Fuel Load

The structures for each experiment were fully furnished to represent a typical fuel load for a residential structure. The furnishings were dimensioned, weighed, and where possible, the base materials used in their construction were determined (Tables S3, S4, S5). Experiment 5 included additional common household items to simulate a cluttered residential fire scene, and not all items were weighed and measured. Ignition was initiated via an electric match located in the corner of the sofa in each experiment as shown on the floor plans in Figures S3 and S4.

**Table S3:** Furnishings and Contents for Experiments 1 and 2

| Item           | Dimensions (cm) | Materials                                     | Mass (kg)             |
|----------------|-----------------|-----------------------------------------------|-----------------------|
| Sofa           | 221 x 91 x 86   | Fabric PE, fill PU foam & PE, frame eng. wood | 53                    |
| Box            | 61 x 61 x 61    | 2 layers of 0.5 in. plywood                   | –                     |
| Carpet         | 1.3 thick       | Fiber 100% PET, PP backing with latex         | 3.3 kg/m <sup>2</sup> |
| Carpet Padding | 1.1 thick       | PU rebond foam                                | 3.1 kg/m <sup>2</sup> |
| OSB Subfloor   | 1.1 thick       | Wood and PF resin                             | 6.8 kg/m <sup>2</sup> |

PE = polyethylene, PET = polyethylene terephthalate, PF = phenol formaldehyde, PP = polypropylene, PU = polyurethane

**Table S4:** Furnishings and Contents for Experiments 3 and 4

| Item              | Dimensions (cm) | Materials                                                    | Mass (kg)             |
|-------------------|-----------------|--------------------------------------------------------------|-----------------------|
| Sofa (2)          | 221 x 91 x 86   | Fabric PE, fill PU foam & PE, frame eng. wood                | 53.0                  |
| Ottoman           | 74 x 41 x 58    | Fabric PE, fill PU foam & PE, frame eng. wood                | 8.4                   |
| Coffee Table      | 140 x 107 x 42  | Vinyl over particle board                                    | 40.6                  |
| End Table         | 66 x 56 x 66    | Vinyl over particle board                                    | 27.9                  |
| TV Stand          | 127 x 51 x 76   | Wood, particle wood with wood veneer                         | 65.5                  |
| TV                | 97 x 56 x 10    | PE shell, glass screen electronic circuits, metal components | 79                    |
| Lamp              | 30 dia x 64     | Body cast vinyl, shade fabric over plastic film              | 1.5                   |
| Curtains (2 pair) | 213 x 213       | 100% PE                                                      | 2.3                   |
| Carpet            | 1.3 thick       | Fiber 100% PET, PP backing with latex                        | 3.3 kg/m <sup>2</sup> |
| Padding           | 1.1 thick       | PU rebond foam                                               | 3.1 kg/m <sup>2</sup> |
| OSB               | 1.1 thick       | Wood and PF resin                                            | 6.8 kg/m <sup>2</sup> |

PE = polyethylene, PET = polyethylene terephthalate, PF = phenol formaldehyde, PP = polypropylene, PU = polyurethane

**Table S5:** Furnishings and Contents for Experiment 5

| Item                          | Dimensions (cm) | Materials                                                          | Mass (kg)             |
|-------------------------------|-----------------|--------------------------------------------------------------------|-----------------------|
| <b>Throughout Compartment</b> |                 |                                                                    |                       |
| Carpet                        | 1.3 thick       | Fiber 100% PET,<br>PP backing with latex                           | 3.3 kg/m <sup>2</sup> |
| Padding                       | 1.1 thick       | PU rebond foam                                                     | 3.1 kg/m <sup>2</sup> |
| OSB                           | 1.1 thick       | Wood and PF resin                                                  | 6.8 kg/m <sup>2</sup> |
| Wall Paneling                 | 1.5 thick       | Plywood                                                            | –                     |
| <b>Living Room</b>            |                 |                                                                    |                       |
| Sofa (2)                      | 221 x 91 x 86   | Fabric PE, fill PU foam<br>& PE, frame eng. wood                   | 53.0                  |
| Ottoman                       | 74 x 41 x 58    | Fabric PE, fill PU foam<br>& PE, frame eng. wood                   | 8.4                   |
| Chair                         | –               | Fabric PE, fill PU foam<br>& PE, frame eng. wood                   | 8.4                   |
| Coffee Table                  | 140 x 107 x 42  | Vinyl over particle board                                          | 40.6                  |
| End Table                     | 66 x 56 x 66    | Vinyl over particle board                                          | 27.9                  |
| TV Stand                      | 127 x 51 x 76   | Wood, particle wood<br>with wood veneer                            | 65.5                  |
| TV                            | 97 x 56 x 10    | PE shell, glass screen<br>electronic circuits,<br>metal components | 79                    |
| Lamp                          | 30 dia x 64     | Body cast vinyl, shade<br>fabric over plastic film                 | 1.5                   |
| Holiday Tree                  | –               | PVC and steel                                                      | –                     |
| CD player                     | –               | Polycarbonate, ABS                                                 | –                     |
| DVD player                    | –               | Styrene acrylonitrile                                              | –                     |
| Toy Bike                      | –               | Plastic                                                            | –                     |
| Toy w/ Battery                | –               | –                                                                  | –                     |
| Storage Bins                  | –               | PP                                                                 | –                     |
| Storage Boxes                 | –               | Cardboard, plastic<br>packing material                             | –                     |
| <b>Bedroom</b>                |                 |                                                                    |                       |
| Mattress                      | 188 x 97 x 30   | 90% PU foam, 10%<br>blended rayon & PE                             | –                     |
| Mattress Topper               | 188 x 97 x 10   | PU foam                                                            | –                     |
| Bed Foundation                | 188 x 97 x 23   | PE padded fabric, wood                                             | –                     |
| Bedding                       | Twin size       | 100% PE                                                            | –                     |
| Pillow (2)                    | 69 x 43 x 10    | Shell 52% PE & 48%<br>cotton, fill 100% PE                         | 1.2                   |

*Continued on next page*

Table S5 – *Continued from previous page*

| Item                | Dimensions (cm) | Materials                                  | Mass (kg) |
|---------------------|-----------------|--------------------------------------------|-----------|
| Curtains (2 pair)   | 213 x 213       | 100% PE                                    | 1.1       |
| Dresser             | 157 x 43 x 91   | Vinyl over particle board w/cardboard back | 49.5      |
| Body Wash           | –               | –                                          | –         |
| Shampoo             | –               | –                                          | –         |
| Deodorant           | –               | –                                          | –         |
| Toothpaste          | –               | –                                          | –         |
| Nail Polish         | –               | –                                          | –         |
| Nail Polish Remover | –               | Acetone,<br>plastic container              | –         |
| Fabric Softener     | –               | –                                          | –         |
| <b>Kitchenette</b>  |                 |                                            |           |
| Recycling Bin       | –               | LDPE                                       | –         |
| Waste Bin           | –               | LDPE                                       | –         |
| Utensils            | –               | Nylon                                      | –         |
| Kitchen Containers  | –               | Polycarbonate                              | –         |
| Laundry Hamper      | –               | PE                                         | –         |
| T-Shirts            | –               | Cotton                                     | –         |
| Air Fryer           | –               | –                                          | –         |
| Microwave           | –               | PE and steel                               | –         |
| Coffee Maker        | –               | PP                                         | –         |
| Toilet Paper        | –               | –                                          | –         |
| Paper towels        | –               | –                                          | –         |
| <b>Office</b>       |                 |                                            |           |
| Office Desk         | –               | Particle board, vinyl                      | –         |
| Bookcase            | –               | Particle board, vinyl                      | –         |
| Laptop w/ Battery   | –               | –                                          | –         |
| Computer            | –               | PVC                                        | –         |
| Stick Vacuum        | –               | PP                                         | –         |
| Shop Vacuum         | –               | PP                                         | –         |
| Baby Gate           | –               | PBT                                        | –         |
| Cork Board          | –               | –                                          | –         |

ABS = acrylonitrile butadiene styrene, LDPE = low density polyethylene, PBT = polybutylene terephthalate, PE = polyethylene, PET = polyethylene terephthalate, PF = phenol formaldehyde, PP = polypropylene, PU = polyurethane

### S.3 Instrumentation

The structures for all five experiments were instrumented to measure gas temperature, gas velocity, gas concentration, pressure, and heat flux. Only the gas temperature and gas concentration measurements were used in the analysis for this study. The locations for these measurements are shown by Figures S3 and S4 for Experiments 1–4 and Experiment 5, respectively.

Experiment 1 and 2 were conducted in bedrooms with a thermocouple array centered in the room and gas probes at two locations: centered along the window wall (Position B) and centered along the wall opposite the sofa (Position A). The elevations of the gas probes used to collect condensate were 10 cm, 61 cm, 122 cm, and 183 cm at Position A, and 81 cm and 239 cm at Position B.

Experiments 3 and 4 were conducted in the living room and included six gas probes for condensate collection. Three of these were located in the living room at Position C with elevations of 61 cm, 122 cm, and 183 cm. Positions D, E, and F were spread along the hallway and included one gas probe each. The elevation was 122 cm at Positions D and E, and 91 cm at Position F.

Experiment 5 included four gas probes for condensate collection. These were grouped in two locations as shown in Figure S4 with elevations of 10 cm and 122 cm at each location.

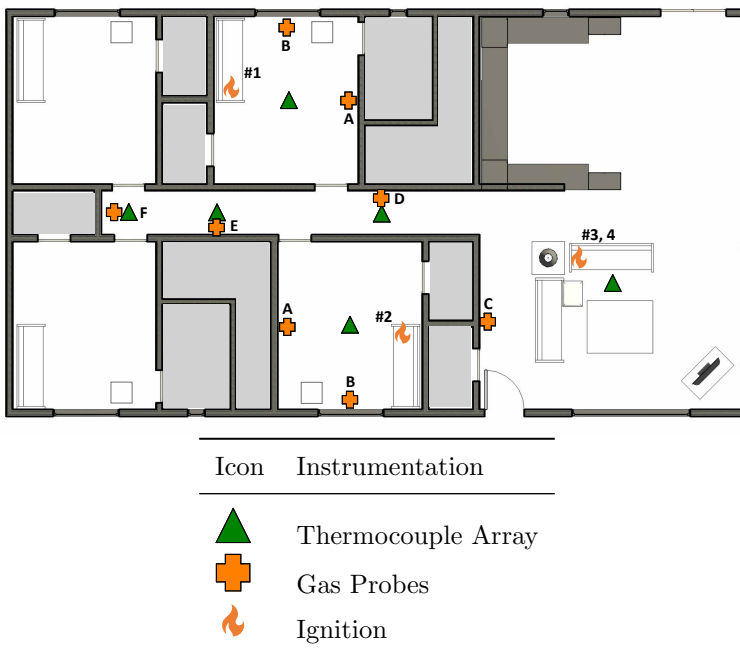

**Fig. S3:** Instrumentation and ignition locations for Experiments 1–4.

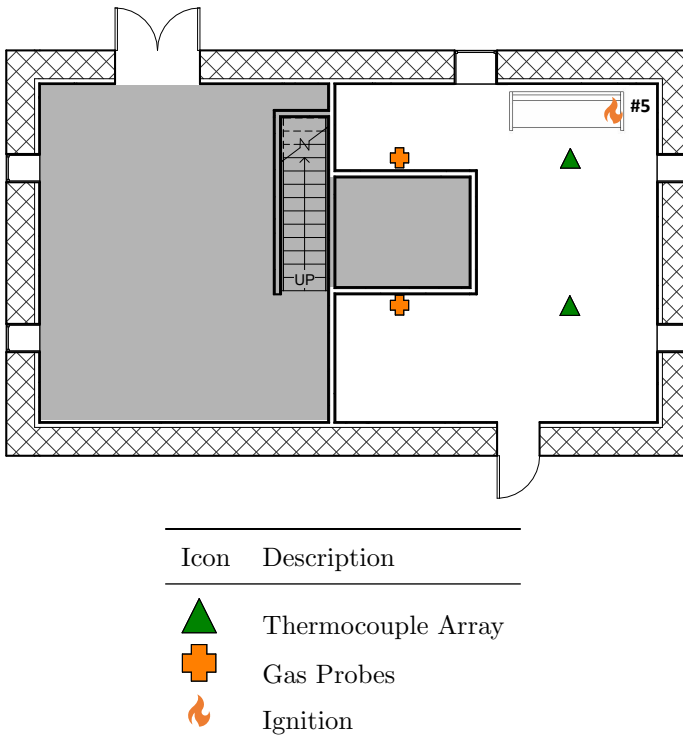

**Fig. S4:** Instrumentation and ignition locations for Experiment 5.



## S.4 Laboratory method detection and reporting limits

**Table S6:** Laboratory method detection limit and reporting limit for Volatile Organic Compounds (EPA 8260B).

| Compound                              | Minimum Detection<br>Limit ( $\mu\text{g/L}$ ) | Reporting<br>Limit ( $\mu\text{g/L}$ ) |
|---------------------------------------|------------------------------------------------|----------------------------------------|
| 1,1,1,2-Tetrachloroethane             | 0.33                                           | 2.0                                    |
| 1,1,1-Trichloroethane                 | 0.32                                           | 1.0                                    |
| 1,1,2,2-Tetrachloroethane             | 0.20                                           | 1.0                                    |
| 1,1,2-Trichloro-1,2,2-trifluoroethane | 0.58                                           | 10                                     |
| 1,1,2-Trichloroethane                 | 0.30                                           | 1.0                                    |
| 1,1-Dichloroethane                    | 0.37                                           | 1.0                                    |
| 1,1-Dichloroethene                    | 0.33                                           | 1.0                                    |
| 1,1-Dichloropropene                   | 0.45                                           | 1.0                                    |
| 1,2,3-Trichlorobenzene                | 0.43                                           | 1.0                                    |
| 1,2,3-Trichloropropane                | 0.27                                           | 5.0                                    |
| 1,2,4-Trichlorobenzene                | 0.36                                           | 1.0                                    |
| 1,2,4-Trimethylbenzene                | 0.34                                           | 1.0                                    |
| 1,2-Dibromo-3-Chloropropane           | 1.5                                            | 10                                     |
| 1,2-Dibromoethane                     | 0.38                                           | 1.0                                    |
| 1,2-Dichlorobenzene                   | 0.28                                           | 1.0                                    |
| 1,2-Dichloroethane                    | 0.22                                           | 0.50                                   |
| 1,2-Dichloropropane                   | 0.39                                           | 1.0                                    |
| 1,3,5-Trimethylbenzene                | 0.34                                           | 1.0                                    |
| 1,3-Dichlorobenzene                   | 0.26                                           | 1.0                                    |
| 1,3-Dichloropropane                   | 0.30                                           | 1.0                                    |
| 1,4-Dichlorobenzene                   | 0.24                                           | 1.0                                    |
| 2,2-Dichloropropane                   | 0.55                                           | 1.0                                    |
| 2-Butanone                            | 3.6                                            | 20                                     |
| 2-Chlorotoluene                       | 0.27                                           | 1.0                                    |
| 2-Hexanone                            | 3.1                                            | 10                                     |
| 4-Chlorotoluene                       | 0.32                                           | 1.0                                    |
| 4-Methyl-2-pentanone                  | 2.9                                            | 10                                     |
| Acetone                               | 10                                             | 20                                     |
| Benzene                               | 0.20                                           | 0.50                                   |
| Bromobenzene                          | 0.30                                           | 1.0                                    |
| Bromochloromethane                    | 0.30                                           | 2.0                                    |
| Bromodichloromethane                  | 0.28                                           | 1.0                                    |
| Bromoform                             | 1.5                                            | 5.0                                    |
| Bromomethane                          | 15                                             | 25                                     |
| Carbon disulfide                      | 0.40                                           | 10                                     |

*Continued on next page*

Table S6 – *Continued from previous page*

| Compound                      | Minimum Detection<br>Limit ( $\mu\text{g/L}$ ) | Reporting<br>Limit ( $\mu\text{g/L}$ ) |
|-------------------------------|------------------------------------------------|----------------------------------------|
| Carbon tetrachloride          | 0.34                                           | 0.50                                   |
| Chlorobenzene                 | 0.21                                           | 1.0                                    |
| Chloroethane                  | 2.4                                            | 5.0                                    |
| Chloroform                    | 0.50                                           | 1.0                                    |
| Chloromethane                 | 2.3                                            | 10                                     |
| cis-1,2-Dichloroethene        | 0.51                                           | 1.0                                    |
| cis-1,3-Dichloropropene       | 0.23                                           | 0.50                                   |
| Dibromochloromethane          | 0.34                                           | 2.0                                    |
| Dibromomethane                | 0.38                                           | 1.0                                    |
| Dichlorodifluoromethane       | 0.56                                           | 5.0                                    |
| Di-isopropyl ether (DIPE)     | 0.36                                           | 2.0                                    |
| Ethanol                       | 60                                             | 100                                    |
| Ethylbenzene                  | 0.33                                           | 1.0                                    |
| Ethyl-t-butyl ether (ETBE)    | 0.49                                           | 2.0                                    |
| Isopropylbenzene              | 0.37                                           | 1.0                                    |
| m,p-Xylene                    | 0.48                                           | 2.0                                    |
| Methylene Chloride            | 4.0                                            | 10                                     |
| Methyl-t-Butyl Ether (MTBE)   | 0.34                                           | 1.0                                    |
| Naphthalene                   | 5.0                                            | 10                                     |
| n-Butylbenzene                | 0.29                                           | 1.0                                    |
| N-Propylbenzene               | 0.41                                           | 1.0                                    |
| o-Xylene                      | 0.26                                           | 1.0                                    |
| p-Isopropyltoluene            | 0.38                                           | 1.0                                    |
| sec-Butylbenzene              | 0.29                                           | 1.0                                    |
| Styrene                       | 0.38                                           | 1.0                                    |
| Tert-amyl-methyl ether (TAME) | 0.56                                           | 2.0                                    |
| tert-Butyl alcohol (TBA)      | 3.9                                            | 10                                     |
| tert-Butylbenzene             | 0.36                                           | 1.0                                    |
| Tetrachloroethene             | 0.35                                           | 1.0                                    |
| Toluene                       | 0.34                                           | 1.0                                    |
| trans-1,2-Dichloroethene      | 0.31                                           | 1.0                                    |
| trans-1,3-Dichloropropene     | 0.30                                           | 0.50                                   |
| Trichloroethene               | 0.35                                           | 1.0                                    |
| Trichlorofluoromethane        | 0.36                                           | 10                                     |
| Vinyl acetate                 | 4.6                                            | 10                                     |
| Vinyl chloride                | 0.26                                           | 0.50                                   |

**Table S7:** Laboratory reporting limit for Anions (EPA 300.0)

| Compound         | Reporting Limit (mg/L) |
|------------------|------------------------|
| Fluoride         | 0.20                   |
| Chloride         | 1.0                    |
| Nitrogen,Nitrite | 0.10                   |
| Bromide          | 0.30                   |
| Nitrogen,Nitrate | 0.10                   |
| Sulfate          | 1.0                    |

## S.5 Temperature and Gas Concentration Time-History

Representative temperature and gas concentration time-history plots are provided for each experiment in Figures S5 – S9. The representative temperatures were measured by the thermocouple array located in the center of the fire room, while the gas concentrations were reported from the 122 cm elevation gas probe in the fire room.

Experiments 1–4 started with all doors and windows closed, and therefore followed similar initial fire development: the fires grew for the first few minutes after ignition until becoming ventilation limited, then remained in a quasi-steady state. The fires in Experiments 2–4 were then provided with additional ventilation, either by window failure or manually opening the exterior door, which caused the fires to transition through flashover. Experiment 5 was unique from the others by having the exterior door open at the start of the experiment, and transitioned through flashover earlier in the experiment timeline. Further details of each experiment is provided with the representative temperature and gas concentration plots.

The fire in Experiment 1 grew for about 4 minutes before becoming ventilation limited, at which point the temperatures and gas concentrations reached peak values, then plateaued (Figure S5). By about 12 minutes after ignition, the temperatures began to decline indicating the fire was in decay. The fire was extinguished via suppression at 20 minutes after ignition. The gas concentrations reflect the growth and decay phases of the fire by the gradual decrease of O<sub>2</sub> concentration and increase in CO and CO<sub>2</sub> concentrations until 12 minutes after ignition. Then the trends reverse direction as the gas concentrations return to ambient conditions in response to the decay of the fire.

The fire scenario for Experiment 2 was similar to Experiment 1, but resulted in failure of the bedroom window at about 33 minutes after ignition. The open vent allowed for exchange of exhausting fire gases with incoming fresh air, causing the bedroom to transition through flashover 2 minutes later. Flashover is noted by the temperature time-history in Figure S6 when the temperatures at all elevations increased to above 600 °C. The fire caused failure of the bedroom door at about 38 minutes after ignition, followed by suppression at 41 minutes. The fire timeline is also reflected by the gas concentration time-histories in Figure S6. The concentrations becoming quasi-steady at about 7 minutes, after the fire becomes ventilation-limited. Then the O<sub>2</sub> concentration depletes to near 0%, and the CO and CO<sub>2</sub> concentrations increase to their maximum measurement ranges in response to the rapid fire growth after the window begins to fail.

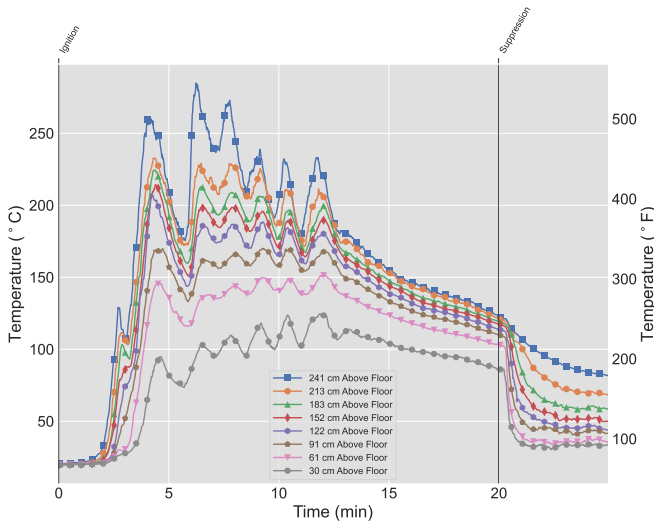

(a) Temperature

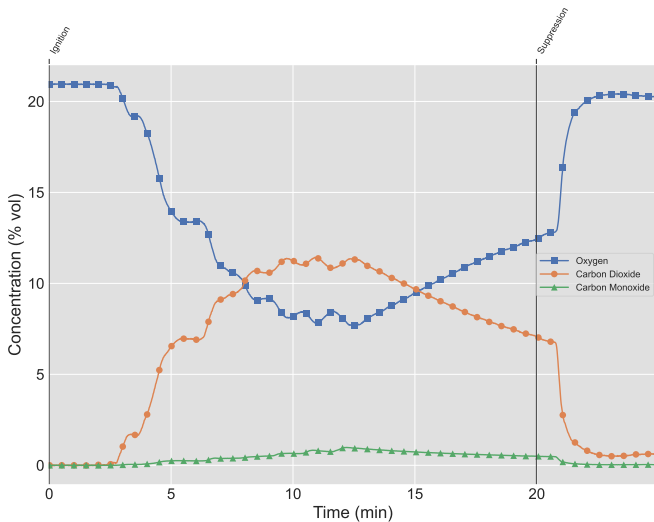

(b) Gas Concentrations – 122 cm (4 ft) elevation

**Fig. S5:** Representative temperature and gas concentration time-histories measured in the fire room in Experiment 1.

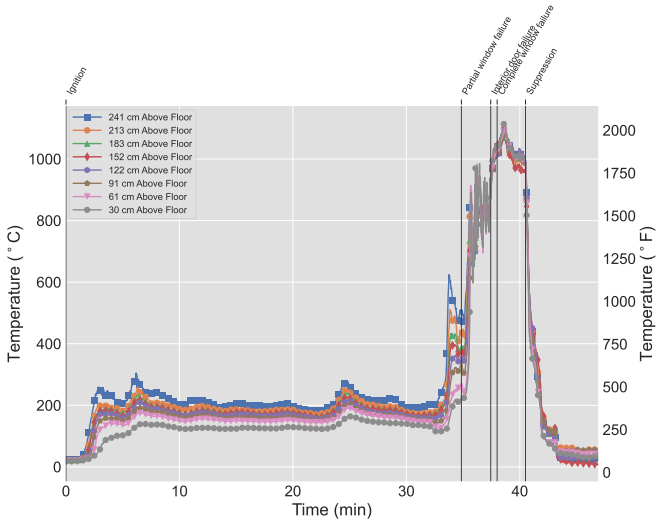

(a) Temperature

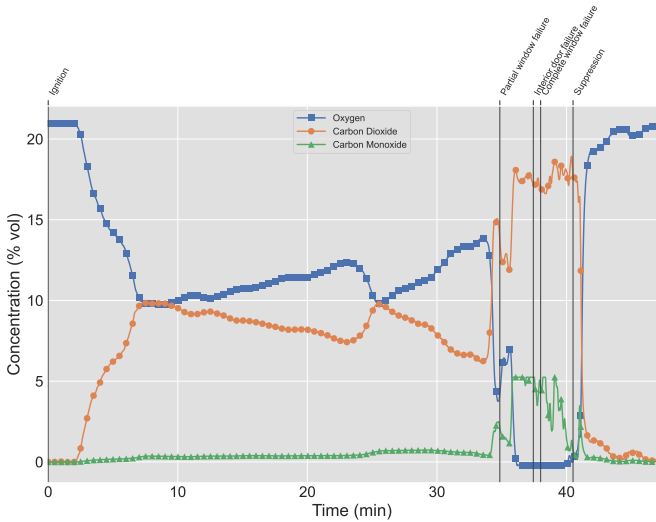

(b) Gas Concentrations – 122 cm (4 ft) elevation

**Fig. S6:** Representative temperature and gas concentration time-histories measured in the fire room in Experiment 2.

Experiments 3 and 4 followed similar timelines: the fires grew until becoming ventilation-limited around 5 minutes after ignition, then quickly decayed and remained in a steady-state until the exterior door was opened. This is shown by the temperature time-histories in Figures S7 and S8 with peak temperatures occurring at 5 minutes, corresponding to values ranging between 200 °C and 900 °C. The temperatures at all elevations then decreased to below 200 °C when the fires decayed. The front door was opened at 18 minutes in Experiment 3 and at 12 minutes in Experiment 4. The open vent allowed the fires to regrow and transition through flashover about 5 minutes after the door was opened. The living room window failed at 23 minutes in Experiment 3 and at 20 minutes in Experiment 4. The temperatures at all elevations increased to above 800 °C and remained elevated until suppression began. The gas concentrations followed similar trends to the temperature time-histories, with O<sub>2</sub> decreasing and CO and CO<sub>2</sub> increasing in response to fire growth. During the post-flashover phase of the fires there were several minutes of sustained peak gas concentrations (approximately 0% O<sub>2</sub>, >5% CO, and >20% CO<sub>2</sub>) for every gas probe used in the condensate collection for both experiments.

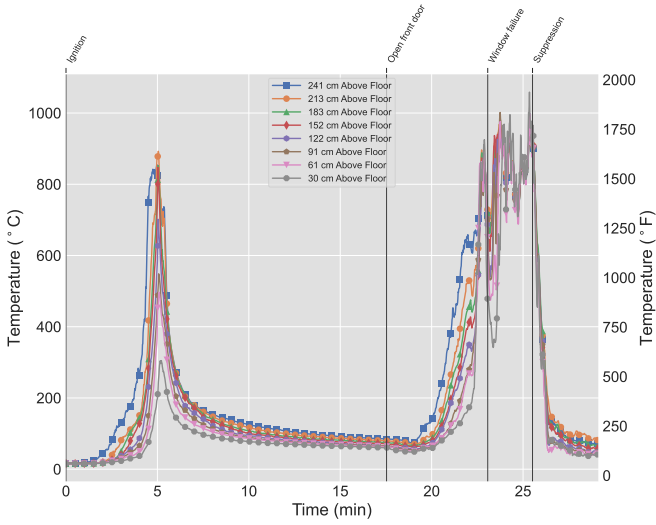

(a) Temperature

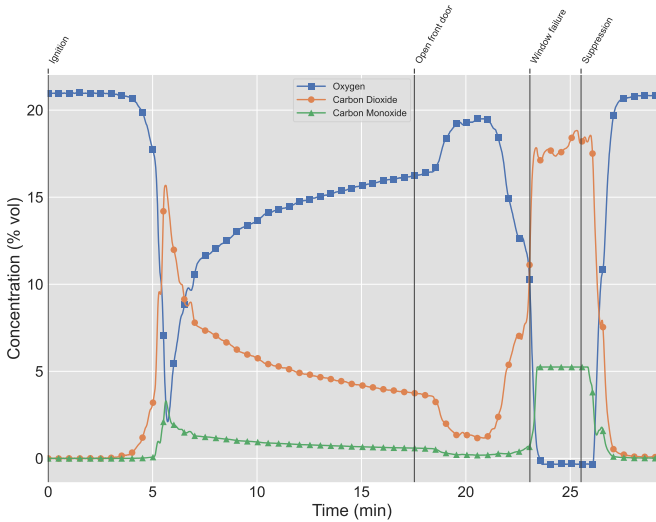

(b) Gas Concentrations – 122 cm (4 ft) elevation

**Fig. S7:** Representative temperature and gas concentration time-histories measured in the fire room in Experiment 3.



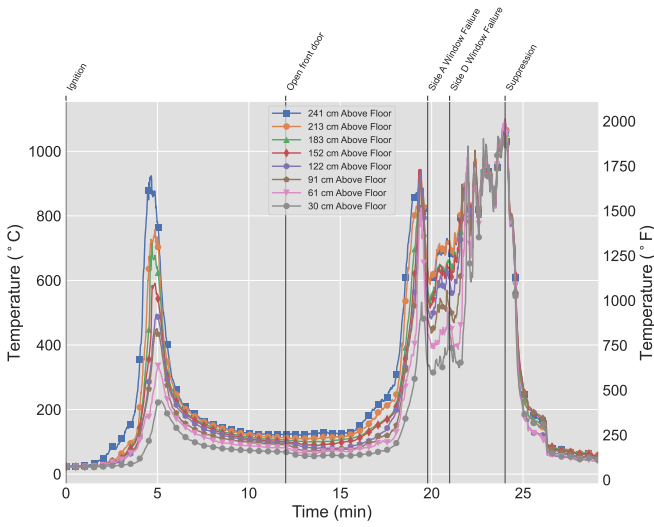

(a) Temperature

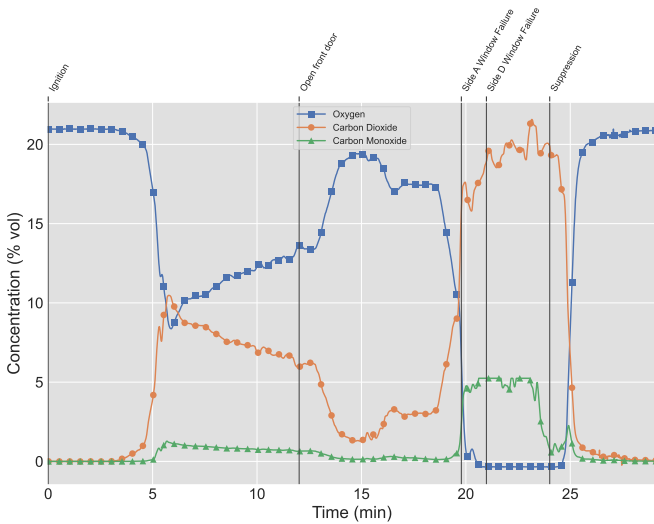

(b) Gas Concentrations – 122 cm (4 ft) elevation

**Fig. S8:** Representative temperature and gas concentration time-histories measured in the fire room in Experiment 4.

Experiment 5 began with the exterior door open, allowing for continued fire growth until the compartment transitioned through flashover at 8 minutes after ignition. The rear window fails at approximately 5.5 minutes and side window fails at 9.5 minutes. The temperature and gas concentration data shown in Figure S9 are from the measurement locations in the rear of the structure, closer to the ignition location but further from the front door. The compartment remained in a fully-involved, post-flashover state until suppression at 18 minutes after ignition.

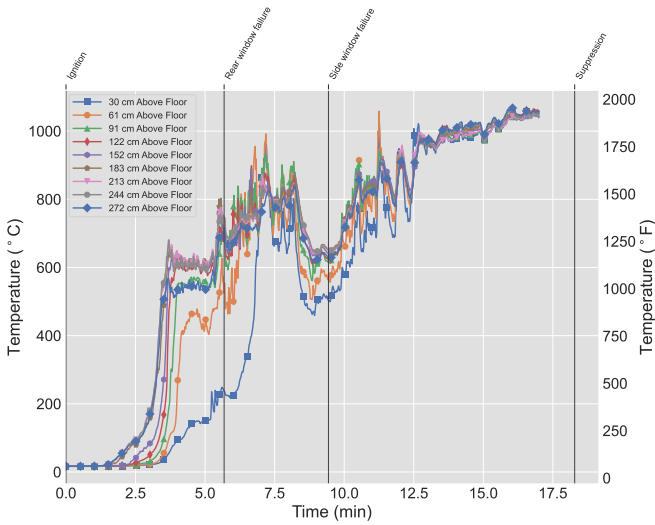

(a) Temperature

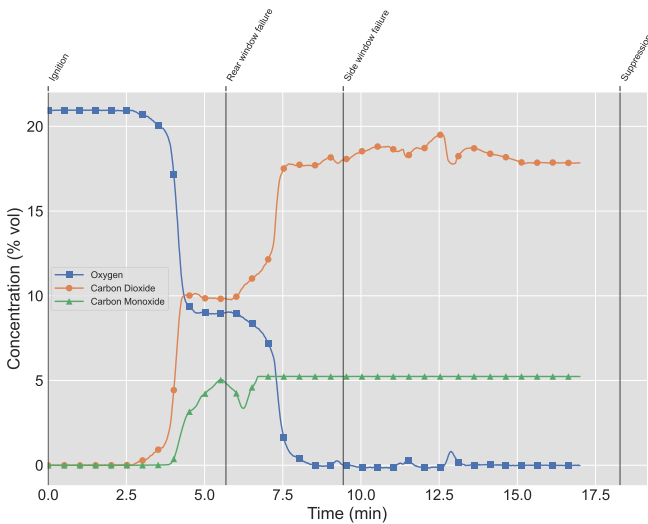

(b) Gas Concentrations – 122 cm (4 ft) elevation

**Fig. S9:** Representative temperature and gas concentration time-histories measured in Experiment 5. Data after 17 minutes (1020 s) is not included due to disruption of the data acquisition system after that time.

**S.6 Complete listing of detectable compounds****Table S8:** Complete listing of condensate VOC detections ( $\mu\text{g}/\text{L}$ )

| Exp. | Compound               | Result | Reporting Limit (RL) | Min Detection Limit (MDL) | Dilution Factor |
|------|------------------------|--------|----------------------|---------------------------|-----------------|
| 1    | 2-Butanone             | 2100*  | 8000                 | 1400                      | 400             |
|      | Acetone                | 57000  | 8000                 | 4000                      | 400             |
|      | Benzene                | 1100   | 200                  | 79                        | 400             |
|      | Ethanol                | ND     | 40000                | 24000                     | 400             |
|      | Naphthalene            | 2700*  | 4000                 | 2000                      | 400             |
|      | o-Xylene               | ND     | 400                  | 100                       | 400             |
|      | Styrene                | ND     | 400                  | 150                       | 400             |
|      | Toluene                | 180*   | 400                  | 140                       | 400             |
| 2    | 2-Butanone             | 3600*  | 8000                 | 1400                      | 400             |
|      | Acetone                | 31000  | 8000                 | 4000                      | 400             |
|      | Benzene                | 6400   | 200                  | 79                        | 400             |
|      | Ethanol                | ND     | 40000                | 24000                     | 400             |
|      | Naphthalene            | 8100   | 4000                 | 2000                      | 400             |
|      | o-Xylene               | 110*   | 400                  | 100                       | 400             |
|      | Styrene                | 1200   | 400                  | 150                       | 400             |
|      | Toluene                | 1000   | 400                  | 140                       | 400             |
| 3    | 2-Butanone             | 7300*  | 20000                | 3600                      | 1000            |
|      | Acetone                | 74000  | 20000                | 10000                     | 1000            |
|      | Benzene                | 2600   | 500                  | 200                       | 1000            |
|      | Ethanol                | 67000* | 100000               | 60000                     | 1000            |
|      | Naphthalene            | 7400*  | 10000                | 5000                      | 1000            |
|      | o-Xylene               | ND     | 1000                 | 260                       | 1000            |
|      | Styrene                | 470*   | 1000                 | 380                       | 1000            |
|      | Toluene                | ND     | 1000                 | 340                       | 1000            |
| 4    | 2-Butanone             | 13000  | 4000                 | 710                       | 200             |
|      | 2-Hexanone             | 170*   | 400                  | 130                       | 40              |
|      | Acetone                | 110000 | 40000                | 20000                     | 2000            |
|      | Benzene                | 3600   | 20                   | 7.9                       | 40              |
|      | Chloromethane          | 170*   | 400                  | 93                        | 40              |
|      | Ethanol                | 49000  | 4000                 | 2400                      | 40              |
|      | Ethylbenzene           | 54     | 40                   | 13                        | 40              |
|      | m,p-Xylene             | 89     | 80                   | 19                        | 40              |
|      | Naphthalene            | 8100   | 2000                 | 1000                      | 200             |
|      | o-Xylene               | 64     | 40                   | 10                        | 40              |
|      | Styrene                | 1400   | 40                   | 15                        | 40              |
|      | Toluene                | 660    | 40                   | 14                        | 40              |
| 5    | 1,2,4-Trimethylbenzene | 610*   | 800                  | 270                       | 800             |
|      | 2-Butanone             | 31000  | 16000                | 2800                      | 800             |
|      | Acetone                | 250000 | 40000                | 20000                     | 2000            |
|      | Benzene                | 33000  | 400                  | 160                       | 800             |
|      | Ethanol                | 61000* | 80000                | 48000                     | 800             |
|      | m,p-Xylene             | 400*   | 1600                 | 390                       | 800             |
|      | Naphthalene            | 10000  | 8000                 | 4000                      | 800             |
|      | o-Xylene               | 510*   | 800                  | 210                       | 800             |
|      | Styrene                | 1800   | 800                  | 300                       | 800             |
|      | Toluene                | 3900   | 800                  | 270                       | 800             |

\*Result is less than the RL but greater than or equal to the MDL and the concentration is an approximate value.

**Table S9:** Complete listing of condensate pH and anion detections (mg/L)

| Experiment | Analyte          | Result | Reporting<br>Limit (RL) | Dilution<br>Factor |
|------------|------------------|--------|-------------------------|--------------------|
| 1          | pH               | 2.56   |                         | 1                  |
|            | Bromide          | ND     | 3.0                     | 10                 |
|            | Chloride         | 270    | 50                      | 10                 |
|            | Nitrogen,Nitrate | 13     | 1.0                     | 10                 |
|            | Sulfate          | 330    | 10                      | 10                 |
| 2          | pH               | 1.10   |                         | 1                  |
|            | Bromide          | 5.5    | 3.0                     | 10                 |
|            | Chloride         | 39,000 | 1000                    | 200                |
|            | Fluoride         | 6.4    | 5.0                     | 25                 |
|            | Nitrogen,Nitrate | 2.4    | 1.0                     | 10                 |
| Sulfate    | 9,200            | 100    | 100                     |                    |
| 3          | pH               | 1.93   |                         | 1                  |
|            | Bromide          | 6.6    | 3.0                     | 10                 |
|            | Chloride         | 3,000  | 1000                    | 200                |
|            | Nitrogen,Nitrate | 5.7    | 1.0                     | 10                 |
|            | Sulfate          | 2,700  | 200                     | 200                |
| 4          | pH               | 1.96   |                         | 1                  |
|            | Bromide          | 9.8    | 3.0                     | 10                 |
|            | Chloride         | 2,400  | 250                     | 50                 |
|            | Nitrogen,Nitrate | ND     | 1.0                     | 10                 |
|            | Sulfate          | 2,100  | 50                      | 50                 |
| 5          | pH               | 1.59   |                         | 1                  |
|            | Bromide          | 13     | 3.0                     | 10                 |
|            | Chloride         | 4,700  | 250                     | 50                 |
|            | Nitrogen,Nitrate | 6.4    | 1.0                     | 10                 |
|            | Sulfate          | 2,300  | 50                      | 50                 |

**Table S10:** Complete listing of baseline rinse VOC detections ( $\mu\text{g/L}$ )

| Exp.                         | Compound               | Result | Reporting Limit (RL) | Min Detection Limit (MDL) | Dilution Factor |
|------------------------------|------------------------|--------|----------------------|---------------------------|-----------------|
| Pre 1                        | 1,2,4-Trimethylbenzene | 1.4    | 1.0                  | 0.34                      | 1               |
|                              | 1,3,5-Trimethylbenzene | 0.67*  | 1.0                  | 0.34                      | 1               |
|                              | 1,4-Dichlorobenzene    | 0.46*  | 1.0                  | 0.24                      | 1               |
|                              | 2-Butanone             | 12*    | 20                   | 3.6                       | 1               |
|                              | Acetone                | ND     | 20                   | 10                        | 1               |
|                              | Benzene                | 29     | 0.50                 | 0.20                      | 1               |
|                              | Ethylbenzene           | 0.42*  | 1.0                  | 0.33                      | 1               |
|                              | m,p-Xylene             | 1.6*   | 2.0                  | 0.48                      | 1               |
|                              | N-Propylbenzene        | 1.3    | 1.0                  | 0.41                      | 1               |
|                              | o-Xylene               | 2.7    | 1.0                  | 0.26                      | 1               |
| Toluene                      | 32                     | 1.0    | 0.34                 | 1                         |                 |
| Pre 2                        | 1,4-Dichlorobenzene    | 0.75*  | 1.0                  | 0.24                      | 1               |
|                              | Acetone                | ND     | 20                   | 10                        | 1               |
|                              | Ethanol                | 93*    | 100                  | 60                        | 1               |
|                              | Toluene                | 1.4    | 1.0                  | 0.34                      | 1               |
| Pre 3                        | Acetone                | 170    | 40                   | 20                        | 2               |
|                              | o-Xylene               | 0.54*  | 2.0                  | 0.51                      | 2               |
|                              | Toluene                | 0.80*  | 2.0                  | 0.68                      | 2               |
| Pre 4                        | 1,4-Dichlorobenzene    | 0.26*  | 1.0                  | 0.24                      | 1               |
|                              | Acetone                | 15*    | 20                   | 10                        | 1               |
|                              | Toluene                | ND     | 1.0                  | 0.34                      | 1               |
| Pre 5                        | Acetone                | 620    | 200                  | 100                       | 10              |
|                              | Benzene                | 2.0    | 0.50                 | 0.20                      | 1               |
|                              | Styrene                | 1.3    | 1.0                  | 0.38                      | 1               |
|                              | Toluene                | 0.89*  | 1.0                  | 0.34                      | 1               |
| Post 4                       | Acetone                | ND     | 20                   | 10                        | 1               |
|                              | Toluene                | ND     | 1.0                  | 0.34                      | 1               |
| Post 5                       | Acetone                | 26     | 20                   | 10                        | 1               |
|                              | Toluene                | ND     | 1.0                  | 0.34                      | 1               |
| Distilled Water<br>(Control) | Acetone                | ND     | 20                   | 10                        | 1               |
|                              | Toluene                | ND     | 1.0                  | 0.34                      | 1               |

\*Result is less than the RL but greater than or equal to the MDL and the concentration is an approximate value.

**Table S11:** Complete listing of baseline rinse pH and anion detections (mg/L)

| Experiment                   | Analyte           | Result | Reporting Limit (RL) | Dilution Factor |
|------------------------------|-------------------|--------|----------------------|-----------------|
| Pre 1                        | pH                | 5.87   |                      | 1               |
|                              | Chloride          | 1.4    | 1.0                  | 1               |
|                              | Sulfate           | 1.4    | 1.0                  | 1               |
| Pre 2                        | pH                | 5.55   |                      | 1               |
|                              | Chloride          | 2.3    | 1.0                  | 1               |
|                              | Sulfate           | 1.2    | 1.0                  | 1               |
| Pre 3                        | pH                | 5.95   |                      | 1               |
|                              | Chloride          | 2.9    | 1.0                  | 1               |
|                              | Sulfate           | 2.3    | 1.0                  | 1               |
| Pre 4                        | pH                | 5.78   |                      | 1               |
|                              | Chloride          | 9.8    | 1.0                  | 1               |
|                              | Sulfate           | 3.1    | 1.0                  | 1               |
| Pre 5                        | pH                | 5.52   |                      | 1               |
|                              | Chloride          | 1,100  | 100                  | 20              |
|                              | Flouride          | 0.21   | 0.20                 | 1               |
|                              | Nitrogen, Nitrate | 0.18   | 0.10                 | 1               |
|                              | Sulfate           | 3.9    | 1.0                  | 1               |
| Post 4                       | pH                | 7.03   |                      | 1               |
|                              | Chloride          | 3.8    | 1.0                  | 1               |
|                              | Sulfate           | 1.1    | 1.0                  | 1               |
| Post 5                       | pH                | 6.78   |                      | 1               |
|                              | Chloride          | 5.4    | 1.0                  | 1               |
|                              | Sulfate           | 2.2    | 1.0                  | 1               |
| Distilled Water<br>(Control) | pH                | 7.32   |                      | 1               |
|                              | Chloride          | ND     | 1.0                  | 1               |
|                              | Sulfate           | ND     | 1.0                  | 1               |

**Table S12:** Complete listing of runoff VOC detections ( $\mu\text{g/L}$ )

| Exp.                | Compound             | Result | Reporting Limit (RL) | Min Detection Limit (MDL) | Dilution Factor |
|---------------------|----------------------|--------|----------------------|---------------------------|-----------------|
| 2                   | Acetone              | ND     | 8000                 | 4000                      | 400             |
|                     | Benzene              | ND     | 200                  | 79                        | 400             |
|                     | Styrene              | ND     | 400                  | 150                       | 400             |
| 3                   | Acetone              | 1100   | 200                  | 100                       | 10              |
|                     | Benzene              | 11     | 5.0                  | 2.0                       | 10              |
|                     | Styrene              | 8.0*   | 10                   | 3.8                       | 10              |
| 4                   | Acetone              | 1900   | 800                  | 400                       | 40              |
|                     | Benzene              | 10*    | 20                   | 7.9                       | 40              |
|                     | Carbon disulfide     | 24*    | 400                  | 16                        | 40              |
|                     | Styrene              | ND     | 40                   | 15                        | 40              |
| 5                   | Trichloroethene      | 17*    | 40                   | 14                        | 40              |
|                     | 2-Butanone           | 120*   | 400                  | 71                        | 20              |
|                     | Acetone              | 1900   | 400                  | 200                       | 20              |
|                     | Benzene              | 68     | 10                   | 3.9                       | 20              |
|                     | Ethanol              | 2500   | 2000                 | 1200                      | 20              |
|                     | Ethylbenzene         | 9.5*   | 20                   | 6.6                       | 20              |
|                     | Styrene              | 98     | 20                   | 7.5                       | 20              |
|                     | Toluene              | 35     | 20                   | 6.8                       | 20              |
| Nozzle<br>(Control) | Acetone              | ND     | 20                   | 10                        | 1               |
|                     | Benzene              | ND     | 0.50                 | 0.20                      | 1               |
|                     | Bromodichloromethane | 9.2    | 1.0                  | 0.28                      | 1               |
|                     | Chloroform           | 17     | 1.0                  | 0.50                      | 1               |
|                     | Dibromochloromethane | 2.6    | 2.0                  | 0.34                      | 1               |
|                     | Styrene              | ND     | 1.0                  | 0.38                      | 1               |

\*Result is less than the RL but greater than or equal to the MDL and the concentration is an approximate value.



**Table S13:** Complete listing of runoff pH and anion detections (mg/L)

| Experiment          | Analyte          | Result | Reporting Limit (RL) | Dilution Factor |
|---------------------|------------------|--------|----------------------|-----------------|
| 2                   | pH               | 12.04  |                      | 1               |
|                     | Bromide          | ND     | 7.5                  | 25              |
|                     | Chloride         | 280    | 130                  | 25              |
|                     | Nitrogen,Nitrate | ND     | 2.5                  | 25              |
|                     | Sulfate          | 1,500  | 25                   | 25              |
| 3                   | pH               | 9.38   |                      | 1               |
|                     | Bromide          | 3.4    | 3.0                  | 10              |
|                     | Chloride         | 230    | 50                   | 10              |
|                     | Nitrogen,Nitrate | 1.3    | 1.0                  | 10              |
|                     | Sulfate          | 7,700  | 200                  | 200             |
| 4                   | pH               | 10.39  |                      | 1               |
|                     | Bromide          | ND     | 3.0                  | 10              |
|                     | Chloride         | 660    | 50                   | 10              |
|                     | Nitrogen,Nitrate | 1.9    | 1.0                  | 10              |
|                     | Sulfate          | 3,000  | 50                   | 50              |
| 5                   | pH               | 11.61  |                      | 1               |
|                     | Bromide          | 4.6    | 3.0                  | 10              |
|                     | Chloride         | 230    | 50                   | 10              |
|                     | Nitrogen,Nitrate | 3.2    | 1.0                  | 10              |
|                     | Sulfate          | 2,200  | 50                   | 50              |
| Nozzle<br>(Control) | pH               | 6.80   |                      | 1               |
|                     | Bromide          | ND     | 0.30                 | 1               |
|                     | Chloride         | 79     | 1.0                  | 1               |
|                     | Nitrogen,Nitrate | 0.69   | 0.10                 | 1               |
|                     | Sulfate          | 13     | 1.0                  | 1               |

## References

- [1] Weinschenk, C.: Analysis of Search and Rescue Tactics in Single-Story Single-Family Homes Part I: Bedroom Fires. Technical report, UL's Fire Safety Research Institute (2022). <https://doi.org/10.54206/102376/DPTN2682>. <https://fsri.org/research-update/search-part-i-update>
- [2] Weinschenk, C., Regan, J.: Analysis of Search and Rescue Tactics in Single-Story Single-Family Homes Part II: Kitchen and Living Room Fires. Technical report, UL's Fire Safety Research Institute (2022). <https://doi.org/10.54206/102376/ZKXW6893>. <https://fsri.org/research-update/search-part-ii-update>
- [3] Madrzykowski, D., Weinschenk, C.: Understanding and Fighting Basement Fires. Technical report, UL Fire-fighter Safety Research Institute (2018). <https://doi.org/10.54206/102376/ETSA5492>. <https://fsri.org/research-update/fsri-and-isfsi-release-report-understanding-and-fighting-basement-fires>
